# Supplementary material for: Hearing Assessment and Rehabilitation for People Living With Dementia
Source: PubMed Central journal article supplement — Ear Hear. 2021 Dec 23;43(4):1089–102. doi: 10.1097/AUD.0000000000001174 (PMC9197139; doi:10.1097/aud.0000000000001174), 2021-12-23
Supplement: aud-43-1089-s001.pdf [file aud-43-1089-s001.pdf]

## Appendix 1. Dementia resources

|                                            |                                                                                                                                                                                                                                                                                                                                             |
|--------------------------------------------|---------------------------------------------------------------------------------------------------------------------------------------------------------------------------------------------------------------------------------------------------------------------------------------------------------------------------------------------|
| Australia                                  | <p>Dementia Australia<br/> <a href="https://www.dementia.org.au/">https://www.dementia.org.au/</a></p> <p>Alzheimer's Association<br/> <a href="https://www.alz.org/au/dementia-alzheimers-australia.asp">https://www.alz.org/au/dementia-alzheimers-australia.asp</a></p>                                                                  |
| Canada                                     | <p>Alzheimer Society of Canada<br/> <a href="https://alzheimer.ca/en">https://alzheimer.ca/en</a></p>                                                                                                                                                                                                                                       |
| France                                     | <p>France Alzheimer<br/> <a href="http://www.francealzheimer.org">http://www.francealzheimer.org</a></p>                                                                                                                                                                                                                                    |
| Germany                                    | <p>The German Alzheimer's Society<br/> <a href="http://www.deutsche-alzheimer.de/">http://www.deutsche-alzheimer.de/</a></p>                                                                                                                                                                                                                |
| Italy                                      | <p>The Federazione Alzheimer Italia<br/> <a href="http://www.alzheimer.it/">http://www.alzheimer.it/</a></p>                                                                                                                                                                                                                                |
| Japan                                      | <p>Alzheimer's Association Japan (AAJ)<br/> <a href="https://www.alzheimer.or.jp/?p=2978">https://www.alzheimer.or.jp/?p=2978</a></p>                                                                                                                                                                                                       |
| Korea                                      | <p>Korean Association for Dementia (KAD)<br/> <a href="http://www.silverweb.or.kr/">http://www.silverweb.or.kr/</a></p>                                                                                                                                                                                                                     |
| United Kingdom                             | <p>Dementia Engagement and Empowerment Project (DEEP)<br/> <a href="https://www.dementiavoices.org.uk/">https://www.dementiavoices.org.uk/</a></p> <p>Alzheimer Scotland<br/> <a href="http://www.alzscot.org/">http://www.alzscot.org/</a></p> <p>Dementia UK<br/> <a href="http://www.dementiauk.org/">http://www.dementiauk.org/</a></p> |
| United States                              | <p>Alzheimer's Association in the USA<br/> <a href="https://www.alz.org/">https://www.alz.org/</a></p> <p>Dementia Friendly America<br/> <a href="https://www.dfamerica.org/">https://www.dfamerica.org/</a></p>                                                                                                                            |
| Links for organisations in other countries | <p>Alzheimer's Association<br/> <a href="https://www.alz.org/">https://www.alz.org/</a></p> <p>Alzheimer Europe<br/> <a href="http://www.alzheimer-europe.org/">http://www.alzheimer-europe.org/</a></p>                                                                                                                                    |

Dementia awareness training

University of Tasmania

<https://www.utas.edu.au/wicking/understanding-dementia>

Dementia Training Australia

<https://dta.com.au/about-dementia-training-australia/>

Alzheimer's Society dementia friends initiative

<https://www.alzheimers.org.uk/about-us/policy-and-influencing/global-dementia-friends-network>
